# Supplementary material for: Metal adatoms generated by the co-play of melamine assembly and subsequent CO adsorption
Source: Royal Society of Chemistry journal article supplement (doi:10.1039/c5cp05976c), 2016-01-01
Supplement: c5cp05976c1.pdf [file c5cp05976c1.pdf]

Supporting information

# Metal Adatoms Generated by Co-play of Melamine Assembly and Subsequent CO Adsorption

Li Wang,<sup>a</sup> Qi-wei Chen,<sup>b</sup> Hong Shi,<sup>a</sup> Hui-hui Liu,<sup>a</sup> Xinguo Ren,<sup>c,d,\*</sup> Bing Wang,<sup>e</sup> Kai Wu,<sup>b,f,\*</sup> and Xiang Shao<sup>a,\*</sup>

<sup>a</sup>Department of Chemical Physics, University of Science and Technology of China, Hefei 230026, China

<sup>b</sup>BNLMS, College of Chemistry and Molecular Engineering, Peking University, Beijing 100871, China

<sup>c</sup>Key Laboratory of Quantum Information, University of Science and Technology of China, Hefei 230026, China

<sup>d</sup>Synergistic Innovation Center of Quantum Information and Quantum Physics, University of Science and Technology of China, Hefei 230026, China

<sup>e</sup>HFNL, University of Science and Technology of China, Hefei 230026, China

<sup>f</sup>Singapore Peking University Research Centre (SPURc), 1 CREATE Way, #15-01, CREATE Tower, 138602, Singapore

## Corresponding Author

\*shaox@ustc.edu.cn, kaiwu@pku.edu.cn, renxg@ustc.edu.cn

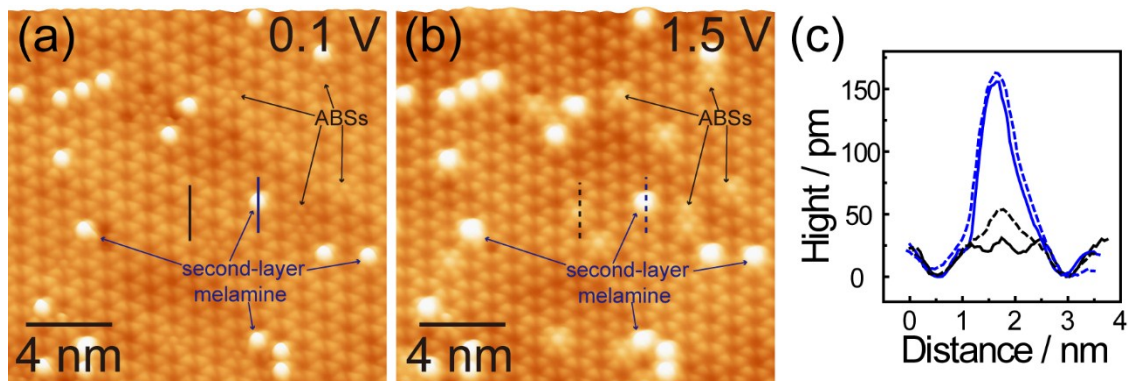

Figure S1. (a) and (b) STM images obtained at different biases showing the distinctive morphologies of the second-layer melamine (2L-Mel) and ABS coexisting on the H-Mel on Au(111). Tunneling conditions: (a)  $I = 88$  pA,  $U = 0.1$  V, (b)  $I = 88$  pA,  $U = 1.5$  V. (c) The height profile of a second-layer melamine (blue line) and a ABS (black line) in (a) and (b).

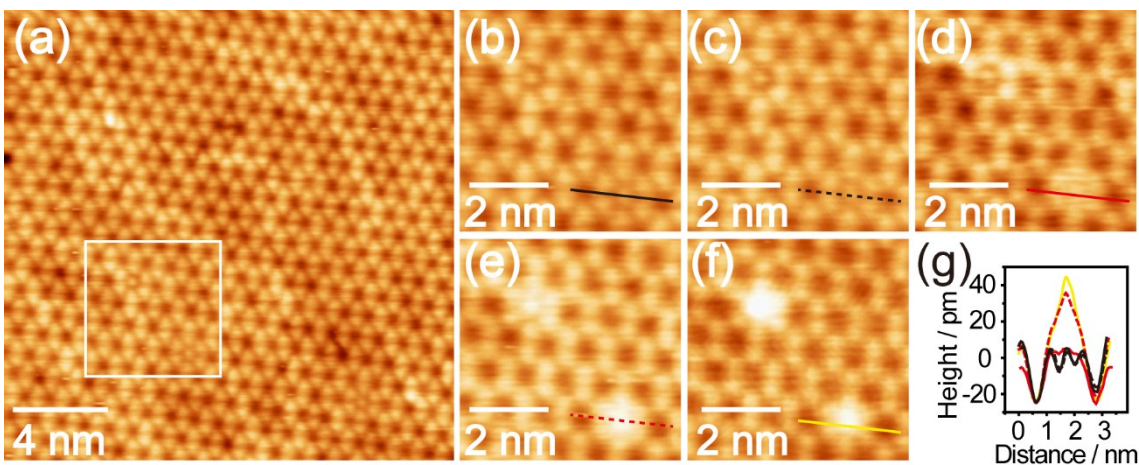

Figure S2. (a) STM image of the honeycomb melamine monolayer on Au(111) with a few intrinsic gold adatoms trapped in the pores. Tunneling conditions: (a)  $I = 140$  pA,  $U = 0.1$  V. (b) - (f) Series of STM images showing bias-dependent morphology of the Au adatoms. (g) Profiles of the same Au adatom at different bias: black line (b, 0.1 V, 140 pA), dashed black line (c, 0.3 V, 140 pA), red line (d, 0.9 V, 60 pA), dashed red line (e, 1.5 V, 50 pA) and yellow line (f, 2.1 V, 50 pA).

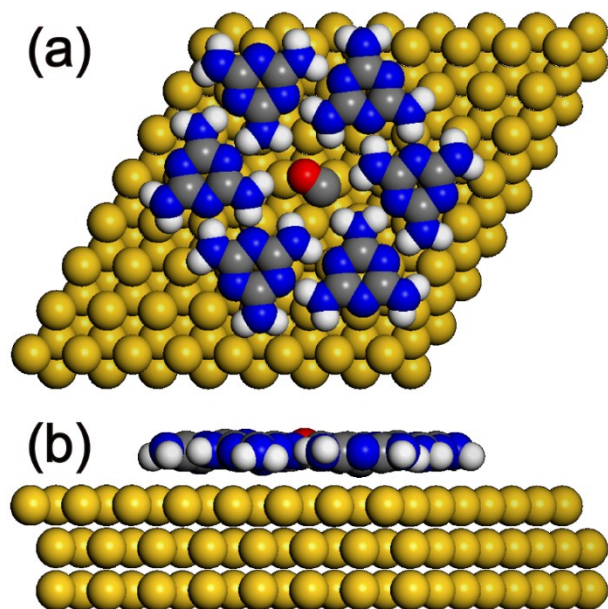

Figure S3. Top view (a) and side view (b) of the calculated model showing CO absorbing in melamine pores with flat-lying configuration. Blue, grey, red and white balls represent N, C, O and H atoms respectively. The substrate atoms are stained in golden color.
